# Supplementary material for: Codesign of health technology interventions to support best-practice perioperative care and surgical waitlist management
Source: HighWire-hosted journal article supplement (doi:10.1136/bmjhci-2023-100928), 2024-03-01
Supplement: bmjhci-2023-100928supp001_data_supplement.pdf [file bmjhci-2023-100928supp001_data_supplement.pdf]

**Supplementary Table S1:** Summary of key demographic and clinical characteristics of personas developed during codesign process.

| Persona | Name, Age, Gender             | Ethnicity, preferred language | Social characteristics                                         | Medical History                                                              | Biophysical parameters                      | Cognition                               | Pathology/Imaging                                                       | Medications                                                                                 | Function                                                 | Prior surgery                    | TAD                                                       |
|---------|-------------------------------|-------------------------------|----------------------------------------------------------------|------------------------------------------------------------------------------|---------------------------------------------|-----------------------------------------|-------------------------------------------------------------------------|---------------------------------------------------------------------------------------------|----------------------------------------------------------|----------------------------------|-----------------------------------------------------------|
| 1       | Harold, 42yo, Male            | First Nations, English        | Office manager, lives with female partner, two children        | Nil                                                                          | BMI 29<br>BP 135/90<br>Pulse 88<br>Resp 16  | No impairment                           | Fasting Glucose 5.7                                                     | Glucosamine<br>Fish oil                                                                     | Independent<br>Active sports player                      | ACL repair                       | Non-smoker,<br>No alcohol,<br>No drug use                 |
| 2       | Gina, 59yo, Female            | Italian, English              | Teacher, lives alone (divorced), no children, carer for mother | T2DM<br>Chronic backpain<br>Recent COVID-19                                  | BMI 30<br>BP 124/80<br>Pulse 72<br>Resp 12  | No impairment                           | HbA1c 6%<br>eGFR >90                                                    | Meloxicam<br>Empagliflozin<br>+ Metformin<br>Amitriptyline                                  | Independent<br>Frailty Score 3<br>DASS 18.95             | Hysterectomy                     | Non-smoker,<br>1-2 standard drinks/day                    |
| 3       | Sam, 55yo, Male               | Arabic, limited English       | Tradie, married, 4 kids, lives with extended family            | IHD<br>Bowel cancer<br>Iron deficiency anaemia                               | BMI 30<br>BP 140/80<br>Pulse 80<br>Resp 16  | No impairment                           | Hb 102<br>Iron deficiency anaemia - low ferritin and iron<br>Albumin 30 | Aspirin<br>Clopidogrel<br>Fish oil<br>Ramipril                                              | Independent                                              | Nil                              | Smoker, 30 pack years, 20/day<br>5-6 standard drinks/week |
| 4       | Tim, 58yo, Male (transgender) | Korean, English               | Chef, single, lives alone, no family in Australia              | T2DM                                                                         | BMI 27<br>BP 120/70<br>Pulse 70<br>Resp 14  | No impairment                           | HbA1c 9.5%                                                              | Metformin<br>Dapagliflozin                                                                  | Independent                                              | Hernia repair                    | Non-smoker,<br>5-6 standard drinks/week                   |
| 5       | Margaret, 80yo, Female        | English                       | Retired, widow, no children, lives alone with niece close by   | Atrial fibrillation<br>T2DM<br>Mild renal impairment<br>Urinary incontinence | BMI 19<br>BP 110-909<br>Pulse 90<br>Resp 15 | No impairment<br>Prior post-op delirium | CrCl 50 mL/min<br>HbA1c 0%<br>Mild anaemia                              | Apixaban<br>Furosemide<br>Metformin<br>Empagliflozin<br>Insulin<br>Metoprolol<br>Oxybutynin | Independent, assistance with shopping<br>Frailty Score 4 | Hysterectomy<br>THR<br>Cataracts | Ex-smoker,<br>independent                                 |

|   |                     |                         |                                                                  |                                                                                                                                                             |                                                  |                                                                                     |                              |                                                                                                                                                                                                           |                                                                         |                                         |                                                |
|---|---------------------|-------------------------|------------------------------------------------------------------|-------------------------------------------------------------------------------------------------------------------------------------------------------------|--------------------------------------------------|-------------------------------------------------------------------------------------|------------------------------|-----------------------------------------------------------------------------------------------------------------------------------------------------------------------------------------------------------|-------------------------------------------------------------------------|-----------------------------------------|------------------------------------------------|
| 6 | Mei, 85yo<br>Female | Mandarin,<br>no English | From nursing<br>home, son and<br>daughter in-law<br>support care | Atrial<br>fibrillation<br>PPM<br>CCF<br>Hypertension<br>T2DM<br>Diabetic foot<br>ulcer<br>Early<br>vascular<br>dementia<br>MCA stroke<br>without<br>deficit | Weight 46 kg<br>BP 145/90<br>Pulse 80<br>Resp 20 | Vascular<br>dementia<br>(RUDAS<br>18/30)<br>Son is<br>medical<br>decision-<br>maker | Hb 98<br>Cr 120 / eGFR 28    | Apixaban<br>Metformin<br>Sitagliptin<br>Digoxin<br>Simvastatin<br>Telmisartan<br>Furosemide<br>Citalopram<br>Vitamin D<br>Denosumab<br>injection<br>Paracetamol                                           | Dependent<br>ADLs<br>Mobilises with<br>walking frame<br>Frailty Score 7 | Carotid<br>endarterectomy<br>NOF repair | Non-smoker,<br>no alcohol                      |
| 7 | Carl, 64yo,<br>Male | English                 | IT consultant,<br>single, lives<br>alone, rural<br>resident      | IHD<br>LHF EF 35%<br>T2DM<br>TIA<br>TURP for<br>cancer<br>Major<br>depression                                                                               | BMI 36.5<br>BP 145/88<br>Pulse 60<br>Resp 14     | No<br>impairment                                                                    | Cr 188 / eGFR 30<br>HbA1c 8% | Insulin<br>Metformin<br>Aspirin<br>Clopidogrel<br>Escitalopram<br>Amlodipine<br>Ramipril<br>Tamsulosin<br>Atorvastatin<br>Esomeprazole<br>PRN GTN<br>Fluticasone<br>propionate +<br>Salmeterol<br>inhaler | Independent<br>Frailty Score 4                                          | TURP<br>Coronary stent<br>Cataracts     | Smoker,<br>20/day, 6<br>standard<br>drinks/day |

TAD: Tobacco Alcohol and Disability; BMI: Body Mass Index; BP: Blood Pressure; ACL: Anterior Cruciate Ligament; T2DM: Type 2 Diabetes Mellitus; Hb: Haemoglobin; HbA1c: Glycated Haemoglobin; eGFR: estimated Glomerular Filtration Rate; DAS: Depression Anxiety Stress Scale; IHD: Ischaemic Heart Disease; CrCl: Creatinine Clearance; THR: Total Hip Replacement; PPM: Permanent Pacemaker; CCF: Congestive Cardiac Failure; MCA: Mid Cerebral Artery; RUDAS: Rowland Universal Dementia Assessment Scale; ADLs: Activities of Daily Living; NOF: Neck of Femur; LHF EF: Left Heart Failure Ejection Fraction; TIA: Transient Ischaemic Attack; TURP: Transurethral Resection of the Prostate; PRN GTN: Glyceryl Trinitrate 'as needed'.
