# Supplementary material for: Codesign of health technology interventions to support best-practice perioperative care and surgical waitlist management
Source: HighWire-hosted journal article supplement (doi:10.1136/bmjhci-2023-100928), 2024-03-01
Supplement: bmjhci-2023-100928supp002_data_supplement.pdf [file bmjhci-2023-100928supp002_data_supplement.pdf]

|                      |                                                                                                                                                                                                                                                                                                                                                                                                                                                                                                                                                                                                                                                                                                                                                                                                      |                                                                                                                                                                                                                                                               |                                                                                                                                                                                                                                                                                                                                                                            |                                                                                                                                                                                                                                                                                                                                     |                                                                                                                                                                                                                                                                    |                                                                                                                                                                                                                                                                                                                                                                   |                                                                                                                                                                                                      |
|----------------------|------------------------------------------------------------------------------------------------------------------------------------------------------------------------------------------------------------------------------------------------------------------------------------------------------------------------------------------------------------------------------------------------------------------------------------------------------------------------------------------------------------------------------------------------------------------------------------------------------------------------------------------------------------------------------------------------------------------------------------------------------------------------------------------------------|---------------------------------------------------------------------------------------------------------------------------------------------------------------------------------------------------------------------------------------------------------------|----------------------------------------------------------------------------------------------------------------------------------------------------------------------------------------------------------------------------------------------------------------------------------------------------------------------------------------------------------------------------|-------------------------------------------------------------------------------------------------------------------------------------------------------------------------------------------------------------------------------------------------------------------------------------------------------------------------------------|--------------------------------------------------------------------------------------------------------------------------------------------------------------------------------------------------------------------------------------------------------------------|-------------------------------------------------------------------------------------------------------------------------------------------------------------------------------------------------------------------------------------------------------------------------------------------------------------------------------------------------------------------|------------------------------------------------------------------------------------------------------------------------------------------------------------------------------------------------------|
| DESCRIPTION          | Tim meets with Orthopaedic Specialist team                                                                                                                                                                                                                                                                                                                                                                                                                                                                                                                                                                                                                                                                                                                                                           | Tim is sent to have an ECG, Stress Test, Endocrine R/V and full bloods to assess and ensure suitability for surgery, or if any action to minimise risks prior to surgery.                                                                                     | Further assessment is requested from:<br>• Endocrine - T2Dm and Transgender/<br>• Cardiologist<br>• Physio                                                                                                                                                                                                                                                                 | Paperwork completed Surgical booking made Education material provided to the patient                                                                                                                                                                                                                                                | Pre habilitation is actioned during waiting time for surgery to improve exercise tolerance and reduce surgical risks                                                                                                                                               | Pre admission clinic Anaesthetic consult Ortho surgery CNC R/V ?further bloods/ECg Pharmacy medication R/V                                                                                                                                                                                                                                                        | Tim presents to day surgery admission clinic and meets with all team members and is admitted for his surgery                                                                                         |
| WHO                  | <ul style="list-style-type: none"> <li>• Tim Orthopaedic</li> <li>• Surgeon Registrar</li> <li>•</li> </ul>                                                                                                                                                                                                                                                                                                                                                                                                                                                                                                                                                                                                                                                                                          | <ul style="list-style-type: none"> <li>• Tim Pathology lab</li> <li>• Endocrinologist (book apt)</li> <li>• Cardiologist (to book apt)</li> <li>•</li> </ul>                                                                                                  | <ul style="list-style-type: none"> <li>• Tim Endocrinology practice, Cardiology</li> <li>• clinic Physiotherapist</li> <li>• Ortho surgeon</li> <li>•</li> </ul>                                                                                                                                                                                                           | <ul style="list-style-type: none"> <li>• Tim Secretary (Admin)</li> <li>• Surgeon/Specialist / Registrar</li> <li>•</li> </ul>                                                                                                                                                                                                      | Tim<br>Physiotherapist                                                                                                                                                                                                                                             | <ul style="list-style-type: none"> <li>• Tim Ortho JMO?</li> <li>• Anaesthetic team</li> <li>• JMO Pharmacy</li> <li>• Radiology (ECG)</li> <li>• PAC Nurse PAC</li> <li>• admin</li> <li>•</li> <li>•</li> </ul>                                                                                                                                                 | <ul style="list-style-type: none"> <li>• Tim Ortho Surgical</li> <li>• team Nurse Theatre</li> <li>• team Ward clerk</li> <li>• Anaesthetist DOSAC</li> <li>• staff</li> <li>•</li> <li>•</li> </ul> |
| QUESTIONS            | <p>Tim asks</p> <ul style="list-style-type: none"> <li>• How much will this cost?</li> <li>• What are the risks of serious complications?</li> <li>• Hospital Length of Stay</li> <li>• When can I return to work</li> <li>• Driving when? Need for a length of rehab Pain</li> <li>• management Wait time</li> <li>• Anaesthetic</li> <li>•</li> <li>• Continuity of Meds</li> <li>• Who does the actual surgery? Specialist or Registrar?</li> <li>• What are the risks of serious complications?</li> </ul> <p>Specialist</p> <ul style="list-style-type: none"> <li>• Do we proceed with Surgery? What type of surgery should be performed? Financial agreement Is this a public or private patient?</li> <li>• Acceptance of benefits versus risk by the patient in order to proceed</li> </ul> | <p>Tim</p> <ul style="list-style-type: none"> <li>• How much will this cost?</li> <li>• Will it Hurt? How long will it take? Do I need time off work? Can I get it done all at once or at the same place? Where do I go to get it done?</li> <li>•</li> </ul> | <p>Tim</p> <ul style="list-style-type: none"> <li>• Why do I have to see all these people its only my hip?</li> <li>• What are the results?</li> <li>• Can I have the surgery?</li> <li>• Are there long-term consequences of this diagnosis? How much will each of these visits cost?</li> <li>• Will this delay my surgery or ability to go on the wait list?</li> </ul> | <p>Tim</p> <ul style="list-style-type: none"> <li>• What is the wait time?</li> <li>• What do I do next?</li> <li>• Who do I call to chase up?</li> </ul> <p>Specialist</p> <ul style="list-style-type: none"> <li>• Is this an acceptable wait time?</li> <li>• Are they public or Private?</li> <li>• Insurance issues</li> </ul> | <p>Physiotherapist</p> <ul style="list-style-type: none"> <li>• What is the baseline</li> <li>• What are the best exercises to improve mobility and manage pain while awaiting surgery? Also, prepare and strengthen the body to improve recovery time.</li> </ul> | <p>Tim</p> <ul style="list-style-type: none"> <li>• Are we going ahead? Where and when do I go? What do I bring to hospital? What meds do I take or stop, and how will this affect me? How long will I be in the hospital?</li> </ul> <p>PAC team</p> <ul style="list-style-type: none"> <li>• Medications to stop pre-surgery and risks - e.g insulin</li> </ul> | <p>Tim</p> <ul style="list-style-type: none"> <li>• When do I go? Can I go home today, Can I take my meds? How long (delays)</li> </ul>                                                              |
| DECISIONS            | Public or private patient Category decision - what category are they for surgery Endocrine referral and cardiology referrals                                                                                                                                                                                                                                                                                                                                                                                                                                                                                                                                                                                                                                                                         | Does the patient need further assessment?                                                                                                                                                                                                                     | Have any further assessment identified any issues that make patient unfit for surgery? Are any further investigations or assessments required?                                                                                                                                                                                                                             |                                                                                                                                                                                                                                                                                                                                     |                                                                                                                                                                                                                                                                    | <ul style="list-style-type: none"> <li>• Male or female bed</li> <li>• Where on surgical priority list</li> </ul>                                                                                                                                                                                                                                                 |                                                                                                                                                                                                      |
| CHALLENGES           | MONEY Wait time to see the specialist Support (lack of) Language barrier                                                                                                                                                                                                                                                                                                                                                                                                                                                                                                                                                                                                                                                                                                                             | Coordinating all these extra things means more time off work, Knowing where to go to get various tests and follow-up activities requested.                                                                                                                    | Chasing documents, Ensuring everyone knows what information has been captured to date and is also sharing information with others. Systems that don't share information. Time off work for patient = \$\$\$                                                                                                                                                                | Wait time Communication Paperwork / insurance                                                                                                                                                                                                                                                                                       | Communication Time off work for Tim as a Chef, shift worker.                                                                                                                                                                                                       | Language Health literacy                                                                                                                                                                                                                                                                                                                                          | Theatre time cancellations Fasted and Diabetic                                                                                                                                                       |
| FEELINGS -Patient    |                                                                                                                                                                                                                                                                                                                                                                                                                                                                                                                                                                                                                                                                                                                                                                                                      |                                                                                                                                                                                                                                                               |                                                                                                                                                                                                                                                                                                                                                                            |                                                                                                                                                                                                                                                                                                                                     |                                                                                                                                                                                                                                                                    |                                                                                                                                                                                                                                                                                                                                                                   |                                                                                                                                                                                                      |
| FEELINGS Clinicians  |                                                                                                                                                                                                                                                                                                                                                                                                                                                                                                                                                                                                                                                                                                                                                                                                      |                                                                                                                                                                                                                                                               |                                                                                                                                                                                                                                                                                                                                                                            |                                                                                                                                                                                                                                                                                                                                     |                                                                                                                                                                                                                                                                    |                                                                                                                                                                                                                                                                                                                                                                   |                                                                                                                                                                                                      |
| Pickers 8 Principles | <ul style="list-style-type: none"> <li>• Clear communication</li> <li>• Fast Access</li> </ul>                                                                                                                                                                                                                                                                                                                                                                                                                                                                                                                                                                                                                                                                                                       | <ul style="list-style-type: none"> <li>• Effective care</li> <li>• Fast Access</li> </ul>                                                                                                                                                                     | <ul style="list-style-type: none"> <li>• Continuity of care</li> <li>• Empathy</li> </ul>                                                                                                                                                                                                                                                                                  | <ul style="list-style-type: none"> <li>• Continuity of care</li> <li>• Patient involved</li> </ul>                                                                                                                                                                                                                                  |                                                                                                                                                                                                                                                                    | <ul style="list-style-type: none"> <li>• Empathy</li> <li>• Clear communication</li> </ul>                                                                                                                                                                                                                                                                        | <ul style="list-style-type: none"> <li>• Empathy</li> </ul>                                                                                                                                          |
