# Supplementary material for: Codesign of health technology interventions to support best-practice perioperative care and surgical waitlist management
Source: HighWire-hosted journal article supplement (doi:10.1136/bmjhci-2023-100928), 2024-03-01
Supplement: bmjhci-2023-100928supp003_data_supplement.pdf [file bmjhci-2023-100928supp003_data_supplement.pdf]

**Supplementary Table S3:** Complete list of authors and contributors (in alphabetical order by surname)

| Author            | Position                    | Email                             | Institutions                                                                                                                                                                                                              | Contribution                                                                          |
|-------------------|-----------------------------|-----------------------------------|---------------------------------------------------------------------------------------------------------------------------------------------------------------------------------------------------------------------------|---------------------------------------------------------------------------------------|
| Sarah Aitken      | Surgeon, Vascular           | Sarah.aitken@sydney.edu.au        | Faculty of Medicine and Health, The University of Sydney;<br>Concord Institute of Academic Surgery, Concord Repatriation<br>General Hospital, Sydney Local Health District                                                | Chief Investigator, Project Design,<br>Evaluation, Manuscript writing and<br>editing. |
| Hector Blamey     | Consumer                    | SLHD-ConcordIAS@health.nsw.gov.au |                                                                                                                                                                                                                           | Project conception and Design,<br>Evaluation.                                         |
| Carina Cutmore    | Resident Doctor,<br>Surgery | Carina.cutmore@sydney.edu.au      | Faculty of Medicine and Health, The University of Sydney;<br>Concord Institute of Academic Surgery, Concord Repatriation<br>General Hospital, Sydney Local Health District                                                | Project Design, Evaluation,<br>Manuscript writing, and editing.                       |
| Anthony Glover    | Surgeon, endocrine          | Anthony.glover@sydney.edu.au      | Faculty of Medicine and Health, The University of Sydney;<br>Royal North Shore Hospital, Northern Sydney Local Health<br>District                                                                                         | Project conception and Design,<br>Manuscript editing.                                 |
| Lilijana Gorringe | Primary Care<br>Physician   | lilijana.gorringe@sydney.edu.au   | Faculty of Medicine and Health, The University of Sydney;                                                                                                                                                                 | Project conception and Design,<br>Manuscript editing.                                 |
| Kerry Hitos       | Epidemiologist              | Kerry.hitos@sydney.edu.au         | Faculty of Medicine and Health, The University of Sydney;<br>Westmead Hospital, Western Sydney Local Health District                                                                                                      | Project conception and Design,<br>Manuscript editing.                                 |
| Sophie James      | Resident Doctor,<br>Surgery | Sophie.james@sydney.edu.au        | Faculty of Medicine and Health, The University of Sydney;<br>Concord Institute of Academic Surgery, Concord Repatriation<br>General Hospital, Sydney Local Health District                                                | Project Design, Evaluation,<br>Manuscript writing, and editing.                       |
| Amy Lawrence      | Anaesthetist                | Amy.lawrence@health.nsw.gov.au    | Concord Institute of Academic Surgery, Concord Repatriation<br>General Hospital, Sydney Local Health District                                                                                                             | Project conception and Design,<br>Manuscript editing.                                 |
| Cherry Leslie     | Consumer                    | SLHD-ConcordIAS@health.nsw.gov.au |                                                                                                                                                                                                                           | Project conception and Design,<br>Evaluation.                                         |
| Andrew Marks      | Anaesthetist                | andrew.w.marks@gmail.com          | Royal North Shore Hospital, Northern Sydney Local Health<br>District                                                                                                                                                      | Project conception and Design,<br>Manuscript editing.                                 |
| Kate McBride      | Healthcare<br>Manager       | Kate.mcbride@health.nsw.gov.au    | RPA Institute of Academic Surgery, Royal Prince Alfred Hospital,<br>Sydney Local Health District                                                                                                                          | Project conception and Design.                                                        |
| Sue Monaro        | Nurse, Vascular             | Sue.monaro@health.nsw.gov.au      | Faculty of Medicine and Health, The University of Sydney;<br>Concord Institute of Academic Surgery, Concord Repatriation<br>General Hospital, Sydney Local Health District;<br>Centre for Clinical Excellence, NSW Health | Project conception and Design,<br>Manuscript editing.                                 |

|                       |                                            |                                         |                                                                                                                                                                            |                                                       |
|-----------------------|--------------------------------------------|-----------------------------------------|----------------------------------------------------------------------------------------------------------------------------------------------------------------------------|-------------------------------------------------------|
| Vasi Naganathan       | Geriatrician                               | Vasi.naganathan@sydney.edu.au           | Faculty of Medicine and Health, The University of Sydney;<br>Concord Institute of Academic Surgery, Concord Repatriation<br>General Hospital, Sydney Local Health District | Project conception and Design,<br>Manuscript editing. |
| Nicole Phillips       | Anaesthetist                               | Nicole.phillips1@health.nsw.gov.au      | Faculty of Medicine and Health, The University of Sydney;<br>Royal Prince Alfred Hospital, Sydney Local Health District                                                    | Project conception and Design,<br>Manuscript editing. |
| Henry Pleass          | Surgeon, transplant                        | Henry.pleass@sydney.edu.au              | Faculty of Medicine and Health, The University of Sydney;<br>Westmead Hospital, Western Sydney Local Health District                                                       | Project conception and Design,<br>Manuscript editing. |
| Angus Richie          | Nephrologist, Chief<br>Information Officer | Angus.richie@health.nsw.gov.au          | Faculty of Medicine and Health, The University of Sydney;<br>Concord Institute of Academic Surgery, Concord Repatriation<br>General Hospital, Sydney Local Health District | Project conception and Design,<br>Manuscript editing. |
| Robert Sanders        | Anaesthetist                               | Robert.sanders@sydney.edu.au            | Faculty of Medicine and Health, The University of Sydney;<br>Royal Prince Alfred Hospital, Sydney Local Health District                                                    | Project conception and Design,<br>Manuscript editing. |
| Danielle Slater       | Consumer                                   | SLHD-ConcordIAS@health.nsw.gov.au       |                                                                                                                                                                            | Project conception and Design,<br>Evaluation.         |
| Michael Solomon       | Surgeon, Colorectal                        | Professor.solomon@sydney.edu.au         | Faculty of Medicine and Health, The University of Sydney;<br>RPA Institute of Academic Surgery, Royal Prince Alfred Hospital,<br>Sydney Local Health District              | Project conception and Design,<br>Manuscript editing. |
| Janani Thillianadesan | Geriatrician                               | Janani.thillianadesan@health.nsw.gov.au | Faculty of Medicine and Health, The University of Sydney;<br>Concord Repatriation General Hospital, Sydney Local Health<br>District                                        | Project conception and Design,<br>Manuscript editing. |
